# Supplementary material for: Combinations of Linear Type Traits Affecting the Longevity in Hungarian Holstein-Friesian Cows
Source: MDPI journal article supplement (doi:10.3390/ani11113065), 2021-10-27
Supplement: s1 [file s1]

**Table S1.** Distribution of major culling causes (%)

| Reason for culling    | Cows (n) | Cows (%) |
|-----------------------|----------|----------|
| Reproduction problems | 3 469    | 25.2     |
| Metabolic disorders   | 2 701    | 19.6     |
| Low milk yield        | 2 138    | 15.5     |
| Udder problems        | 2 012    | 14.6     |
| Others                | 1 894    | 13.8     |
| Foot or leg problems  | 1 430    | 10.4     |
| Unknown               | 123      | 0.7      |
| Total                 | 12 767   | 100      |

Table 1. presents the most important culling reasons. Reproduction problems (25.2%) were the major culling cause, followed by metabolic disorders (19.6%), low milk yield (15.5%), udder problems (14.6%), others (13.8%), foot or leg problems (10.4%) and finally unknown problems (0.7%). The ranking of reproduction problems was in agreement with [1], [2] and [3], as they reported the most important cause of culling was the poor fertility for the Holstein-Friesian dairy cows. Frequency of udder problems in our study was in align with [2] and was smaller compared to [3] findings. According to [4], the frequent culling causes were diseases (38.7%), reproduction problems (36.0%), udder disorders (7.7%), lameness (3.7%) and death (12.7%) for Holstein dairy cows.

## References

1. Mohammadi, G.R.; Sedighi, A. Reasons for culling of Holstein dairy cows in Neishaboor area in northeastern Iran. *Iran J. Vet. Res.* **2009**, *10*, 278-282. <https://doi.org/10.22099/IJVR.2009.1709>
2. Adamczyk, K.; Makulska, J.; Jagusiak, W.; Węglarz, A. Associations between strain, herd size, age at first calving, culling reason and lifetime performance characteristics in Holstein-Friesian cows. *Animal* **2016**, *11*, 327-334. <https://doi.org/10.1017/S1751731116001348>
3. Chiumia, D.; Chagunda, M.G.G.; Macrae, A.I.; Roberts, D.J. Predisposing factors for involuntary culling in Holstein-Friesian dairy cows. *J. Dairy Res.* **2012**, *80*, 45–50. <https://doi:10.1017/S002202991200060X>
4. Boujenane, I. Reasons and risk factors for culling of Holstein dairy cows in Morocco. *J. Livest. Sci. Technol.* **2017**, *5*, 25-31. <https://doi: 10.22103/jlst.2017.1661>
